# Supplementary material for: Telomere Dysfunction in Pediatric Patients with Differences/Disorders of Sexual Development
Source: MDPI journal article supplement (doi:10.3390/biomedicines12030565), 2024-03-02
Supplement: s1 [file s1]

**Supplementary Table S1: Clinical and cytogenetic characteristics of the DSD patient cohort**

| Identifiers | Civilian Sexes | Ages in months | Reason for consultation         | FISH (SRY)                 | Karyotypes   | Additional chromosome aberrations                                                                              |
|-------------|----------------|----------------|---------------------------------|----------------------------|--------------|----------------------------------------------------------------------------------------------------------------|
| YH001       | M              | 0,00           | DSD                             | XY (SRY+)                  | 46,XY        |                                                                                                                |
| YH002       | M              | 178,00         | DSD (micro penis)               | XY (SRY+)                  | 46,XY        |                                                                                                                |
| YH003       | F              | 3,00           | Prader DSD Type I               | XX (SRY-)                  | 46,XX        |                                                                                                                |
| YH004       | M              | 0,00           | DSD                             | XY (SRY+)                  | 46, XY       | ⇒ DNA Fragmentation<br>⇒ Dicentric with interstitial telomeres                                                 |
| YH005       | M              | 4,00           | DSD                             | XX (SRY-)                  | 46,XX        |                                                                                                                |
| YH006       | M              | 33,00          | DSD                             | XY (SRY+)                  | 46,XY        |                                                                                                                |
| YH007       | M              | 19,00          | DSD (Hypospadias)               | XY (SRY+)                  | 46,XY        |                                                                                                                |
| YH008       | M              | 120,00         | DSD                             | 28% XY/ 57% X (SRY+)       | 46,XY/ 45X   |                                                                                                                |
| YH009       | M              | 7,00           | DSD                             | 57,5% XY/ 42,5% XXY (SRY+) | 46,XY/47,XXY |                                                                                                                |
| YH010       | F              | 42,00          | DSD                             | XX (SRY-)                  | 46,XX        |                                                                                                                |
| YH011       | M              | 1,00           | DSD                             | XY (SRY+)                  | 46,XY        |                                                                                                                |
| YH012       | M              | 166,00         | DSD                             | XY (SRY+)                  | 46,XY        |                                                                                                                |
| YH013       | F              | 3,00           | DSD                             | XY (SRY+)                  | 46,XY        |                                                                                                                |
| YH014       | F              | 0,00           | DSD                             | XX (SRY-)                  | 46,XX        | ⇒ Chromosomal breakage<br>⇒ Loss of a long arm of chromosome 15                                                |
| YH015       | F              | 180,00         | DSD                             | 71% XX /29% X( SRY-)       | 46,XX/45,X   |                                                                                                                |
| YH016       |                |                | DSD                             | XX (SRY-)                  | 46,XX        | ⇒ Fusion between chromatids of chromosomes (8 and 10)                                                          |
| YH017       | M              | 13,00          | DSD                             | XY (SRY+)                  | 46,XY        | ⇒ Fusion between chromatids of chromosomes (15 and 4)<br>⇒ Fusion between chromatids of chromosomes (15 and 9) |
| YH018       | ND             | 0,00           | DSD                             | XY (SRY+)                  | 46,XY        |                                                                                                                |
| YH019       | ND             | 0,00           | DSD                             | XX (SRY-)                  | 46,XX        |                                                                                                                |
| YH020       | M              | 130,00         | Hypospadias post DSD            | XY (SRY+)                  | 46,XY        | ⇒ Chromosomal breakage                                                                                         |
| YH021       | ND             | 0,00           | DSD                             | XY (SRY+)                  | 46,XY        |                                                                                                                |
| YH022       | M              | 27,00          | Micro penis                     | XY (SRY+)                  | 46,XY        |                                                                                                                |
| YH023       | F              | 23,00          | Congenital genital malformation | XX (SRY-)                  | 46,XX        |                                                                                                                |
| YH024       | M              | 11,00          | DSD                             | XY (SRY+)                  | 46,XY        |                                                                                                                |
| YH025       | F              | 17,00          | External Genitalia Anomaly      | XX (SRY-)                  | 46,XX        |                                                                                                                |
| YH026       | F              | 0,00           | DSD                             | XX (SRY-)                  | 46,XX        |                                                                                                                |
| YH027       | F              | 0,00           | DSD                             | XX (SRY-)                  | 46,XX        |                                                                                                                |
| YH028       | ND             | 0,00           | DSD + polymalformation          | XY (SRY+)                  | 46,XY        |                                                                                                                |
| YH029       | M              | 1,00           | DSD                             | XY (SRY+)                  | 46,XY        |                                                                                                                |
| YH030       | M              | 7,00           | DSD                             | XX (SRY-)                  | 46,XX        | ⇒ Acentric chromosome                                                                                          |
| YH031       | F              | 30,00          | Anomalies des OGE               | XY (SRY+)                  | 46,XY        |                                                                                                                |
| YH032       | M              | 1,00           | DSD                             | XY (SRY+)                  | 46,XY        | ⇒ Chromosomal breakage                                                                                         |
| YH033       | F              | 35,00          | DSD                             | XX (SRY-)                  | 46,XX        | ⇒ DNA Fragmentation                                                                                            |
| YH034       | F              | 3,00           | DSD                             | XX (SRY-)                  | 46,XX        |                                                                                                                |
| YH035       | F              | 2,00           | DSD                             | XY (SRY+)                  | 46,XY        |                                                                                                                |
